1 **TITLE**

2 PELP1/SRC-3-dependent regulation of metabolic kinases drives therapy resistant ER+ breast  
3 cancer

4

5 **AUTHORS**

6 Thu H. Truong<sup>1</sup>, Elizabeth A. Benner<sup>1</sup>, Kyla M. Hagen<sup>1</sup>, Nuri A. Temiz<sup>1,4</sup>, Carlos Perez Kerkvliet<sup>1</sup>,  
7 Ying Wang<sup>1</sup>, Thomas Pengo<sup>5</sup>, Katrin P. Guillen<sup>6,8</sup>, Bryan W. Welm<sup>6,7,8</sup>, Sucheta Telang<sup>9</sup>, \*Carol  
8 A. Lange<sup>1,2,3</sup>, and \*Julie H. Ostrander<sup>1,2</sup>

9 \* co-senior authors

10

11 **AFFILIATIONS**

12 <sup>1</sup> Masonic Cancer Center, <sup>2</sup> Department of Medicine (Division of Hematology, Oncology, and  
13 Transplantation), <sup>3</sup> Department of Pharmacology, <sup>4</sup> Institute for Health Informatics, and <sup>5</sup> University  
14 of Minnesota Informatics Institute, University of Minnesota, Minneapolis MN 55455 USA

15 <sup>6</sup> Department of Oncological Sciences, <sup>7</sup> Department of Surgery, and <sup>8</sup> Huntsman Cancer Institute,  
16 University of Utah, Salt Lake City UT 84112,

17 <sup>9</sup> James Graham Brown Cancer Center, Department of Medicine (Division of Medical Oncology  
18 and Hematology), University of Louisville, Louisville KY 40202 USA

19

20

21

22

23

24

25

26

27

28

29

30

31

32

33

34

## 35 **ABSTRACT**

36 Recurrence of metastatic breast cancer stemming from acquired endocrine and chemotherapy  
37 resistance remains a health burden for women with luminal (ER+) breast cancer. Disseminated  
38 ER+ tumor cells can remain viable but quiescent for years to decades. Contributing factors to  
39 metastatic spread include the maintenance and expansion of breast cancer stem cells (CSCs).  
40 Breast CSCs frequently exist as a minority population in therapy resistant tumors. In this study,  
41 we show that cytoplasmic complexes composed of steroid receptor (SR) co-activators, PELP1  
42 and SRC-3, modulate breast CSC expansion through upregulation of the HIF-activated metabolic  
43 target genes *PFKFB3* and *PFKFB4*. Seahorse metabolic assays demonstrated that cytoplasmic  
44 PELP1 influences cellular metabolism by increasing both glycolysis and mitochondrial respiration.  
45 PELP1 interacts with PFKFB3 and PFKFB4 proteins, and inhibition of PFKFB3 and PFKFB4  
46 kinase activity blocks PELP1-induced tumorspheres and protein-protein interactions with SRC-3.  
47 PFKFB inhibitors exhibited combinatorial effects in conjunction with ER targeted therapies in  
48 breast cancer cells, including tamoxifen resistant (TamR) and paclitaxel resistant (TaxR) models  
49 and ER+ patient-derived organoids (PDxO). Finally, PFKFB4 knockdown resulted in decreased  
50 circulating tumor cell (CTC) populations in mammary intraductal (MIND) models. Together, our  
51 data suggest that PELP1, SRC-3, and PFKFBs cooperate to drive ER+ tumor cell populations  
52 that include CSCs and CTCs. Identifying non-ER pharmacological targets offers a useful  
53 approach to blocking metastatic escape from standard of care ER/estrogen (E2)-targeted  
54 strategies to overcome endocrine and chemotherapy resistance.

55

56

## 57 **INTRODUCTION**

58 Metastatic recurrence is an incurable but common complication of ER+ breast cancer. Treatment  
59 of metastatic breast cancer typically results in endocrine resistance and chemotherapy is largely  
60 ineffective. Altered signaling pathways drive therapy resistance and offer potential targets for  
61 metastatic ER+ breast cancer. Studies have shown that endocrine resistance is independently  
62 driven by PELP1 (proline, glutamic acid, leucine-rich protein 1) and SRC-3 (steroid receptor [SR]  
63 co-activator-3). PELP1 and SRC-3 are both SR co-activators involved in normal development and  
64 cancer (1,2). Increased PELP1 expression is associated with higher tumor grade, tumor  
65 proliferation, and decreased breast cancer-specific survival (3,4). PELP1 is primarily nuclear in  
66 normal breast tissue; however, altered cytoplasmic PELP1 localization is observed in 40-58% of  
67 PELP1+ breast tumors (5). Analysis of breast tumor samples revealed that patients with high  
68 cytoplasmic PELP1 levels were less likely to respond to tamoxifen (tam) (4). Similarly, SRC-3

69 mRNA and protein overexpression are correlated with higher tumor grade and decreased overall  
70 and disease-free survival (6). SRC-3 overexpression is also linked to tam resistance in breast  
71 cancer models and human breast tumors (7,8). Both PELP1 and SRC-3 have essential nuclear  
72 functions, but also dynamically shuttle to the cytoplasm where they associate with signaling  
73 molecules and act as scaffolds for growth factor or SR pathways. These SR co-activators have  
74 emerged as promising targets in ER+ breast cancer and as potential mediators of therapy  
75 resistance.

76

77 Cancer stem cells (CSCs) are poorly proliferative and frequently exist as a minority sub-population  
78 of cells that drive therapy resistance and metastasis (9). In contrast to non-CSCs, breast CSCs  
79 form colonies in serum-free suspension culture (i.e. tumorspheres), express stem cell markers  
80 (e.g. ALDH+ or CD44<sup>hi</sup>/CD24<sup>lo</sup>), exhibit enhanced resistance to chemo and endocrine therapies,  
81 and express markers of epithelial to mesenchymal transition (EMT). The ability to survive and  
82 self-renew following treatment allows CSCs to evade standard chemo and endocrine therapies  
83 aimed at rapidly dividing cancer cells and to drive metastatic tumor growth.

84

85 Growing evidence has implicated SR co-activators as mediators of CSC self-renewal. For  
86 example, SRC-3 drives CSC formation and tumor outgrowth in breast cancer models. Treatment  
87 with SI-2, an SRC-3 inhibitor, decreased SRC-3-induced CSC formation in breast cancer cell and  
88 xenograft models (10). Our laboratory reported that cytoplasmic complexes composed of PELP1  
89 and SRC-3 mediate breast CSC expansion (11). Targeting SRC-3 using shRNA or  
90 pharmacological inhibitors (i.e. SI-2) abrogated PELP1/SRC-3 complex formation, PELP1-  
91 induced tumorspheres, and expression of PELP1 target genes that promote cancer cell survival.  
92 These studies imply that inhibiting PELP1 and its binding partners may provide a way to target  
93 the breast CSC population in order to improve patient outcomes.

94

95 Herein we sought to identify mechanisms that contribute to PELP1-driven CSC survival and self-  
96 renewal in ER+ breast cancer. Using endocrine and chemotherapy resistant breast cancer  
97 models, our findings suggest that PELP1/SRC-3 complexes modulate the CSC compartment  
98 through gene programs associated with metabolic adaptation. Importantly, we demonstrate  
99 rational combinations of inhibitors that target PELP1-binding partners and/or endocrine therapies  
100 reduced CSC populations in preclinical patient-derived organoid (PDxO) models. Furthermore,  
101 knockdown of PELP1 binding partners reduced circulating tumor cells (CTC) in mouse mammary  
102 intraductal (MIND) xenografts *in vivo*. In contrast to current therapies that fail to adequately target

103 slow-growing breast CSCs, our studies reveal therapy combinations that inhibit cooperating  
104 signaling cascades, while simultaneously targeting ER. By targeting CSCs directly, this approach  
105 promises to significantly improve the lives of patients with recurrent ER+ breast cancer.

106

107

## 108 **MATERIALS AND METHODS**

109 **Cell Culture.** STR authentication was performed by ATCC (October 2018). MCF-7 PELP1 and  
110 J110 cells were cultured as described (11). MCF-7 (12) and T47D TamR (13) cells were cultured  
111 in 100 nM tamoxifen. MCF-7 TaxR (14) cells were cultured in 2  $\mu$ M Taxol. For 3D (tumorsphere)  
112 conditions, cells were cultured as described (11).

113

114 **Seahorse Assays.** Seahorse XFe96 Analyzer (Agilent) was used to measure ECAR and OCR  
115 levels. MCF-7 PELP1 cells were seeded into Agilent XF96 culture plates ( $2.5 \times 10^4$  cells/well with  
116 22.4  $\mu$ g/ml Cell Tak) and incubated at 37 °C for 24 h. Cells were washed 2x and incubated in  
117 Seahorse XF DMEM media (2 mM L-glutamine, 11.11 mM glucose, 1.0 mM sodium pyruvate; pH  
118 7.4) at 37 °C in a CO<sub>2</sub>-free incubator for 45 min. ECAR and OCR were detected under basal  
119 conditions followed by addition of 0.5  $\mu$ M FCCP and 2  $\mu$ M oligomycin using the XF Cell Energy  
120 Phenotype and Mito Stress Test (Agilent). Protein concentrations were measured by BCA Assay  
121 following addition of RIPA-lite (25  $\mu$ l/well). ECAR and OCR data were normalized to total protein  
122 concentration per well. Data are presented as the average  $\pm$  SD of experimental triplicates. MCF-  
123 7 TaxR cell conditions:  $1 \times 10^4$  cells/well, Seahorse XF DMEM media (2 mM L-glutamine, 5.55  
124 mM glucose, 1 mM sodium pyruvate; pH 7.4), FCCP (0.25-0.5  $\mu$ M), and oligomycin (2  $\mu$ M).

125

126 **Glucose Uptake.** Glucose uptake was measured using 2-NBDG (Thermo Fisher). Cells were  
127 incubated in glucose-free DMEM containing 1% HEPES (Gibco) for 15 min and then treated with  
128 2-NBDG for 25 min at 37 °C. Cells were dissociated using trypsin, washed, and resuspended in  
129 cold FACS buffer (D-PBS containing 2% FBS). 2-NBDG fluorescence was quantified by flow  
130 cytometry, and sorting gates were established using untreated control cells.

131

132 **Patient-Derived Organoids (PDxO).** PDxOs (HCI-003, HCI-017) were cultured in Advanced  
133 DMEM/F12 (Thermo Fisher) containing 5% FBS, 1X HEPES, 1X GlutaMax, 50  $\mu$ g/ml Gentamicin  
134 (Genesee), 1  $\mu$ g/ml hydrocortisone, 10 ng/ml EGF, and supplemented with 10  $\mu$ M Y-27632  
135 (Selleckchem), 100 ng/ml FGF2 (PeproTech), and 1 mM N-acetyl cysteine (Sigma). PDxOs were  
136 embedded into Matrigel (growth factor reduced; Corning) and passaged every ~14-18 days.

137

138 **Mammary Intraductal (MIND) Model.** Intraductal injections of single cells were performed as  
139 described (15,16). Seven-week old female NSG mice were purchased from Jackson Laboratory.  
140 Five mice/group were injected with  $5 \times 10^4$  cells into each nipple of the 4<sup>th</sup> inguinal glands with the  
141 indicated breast cancer cell line. Mammary glands were harvested 8 weeks after injection, fixed  
142 in 4% PFA, and processed for H&E staining. H&E sections were analyzed using ImageJ or Q-  
143 path to quantitate the total mammary gland area (%) that contained tumor cells.

144

145 **CTC Soft Agar Assays.** Fresh mouse blood samples were processed using Isolymp/Ficoll-  
146 Paque (Sigma). Buffy coat containing circulating tumor cells was seeded into DMEM containing  
147 5% FBS, 1X sterile low melt agarose (Thermo Fisher), and 1X penicillin streptomycin. Colonies  
148 were grown for 14 days at 37 °C. Data are presented as the average  $\pm$  SD of five independent  
149 measurements.

150

151 **Statistical Analysis.** Data were tested for normal distribution using Shapiro-Wilks normality test  
152 and homogeneity of variances using Bartlett's Test. Once data met these two requirements,  
153 statistical analyses were performed using one-way or two-way ANOVA in conjunction with Tukey  
154 multiple comparison test for means between more than two groups or Student *t* test for means  
155 between two groups, where significance was determined with 95% confidence. For the MIND  
156 study with four groups defined by two factors (cyto PELP1 vs. WT PELP1, and shPFKFB4 vs.  
157 shGFP), a regression model identified a significant interaction due to shPFKFB4 at an alpha level  
158 of 0.1 ( $p=0.084$ ).

159

160

## 161 **RESULTS**

### 162 **Cytoplasmic PELP1 promotes CSCs and HIF-regulated gene expression**

163 Breast CSCs represent a minority of the total cell population (1-5%) (17), making it difficult to  
164 detect CSC-specific changes in heterogeneous populations. We therefore measured breast CSC  
165 frequency by comparing ALDH activity (**Figure 1A, Supplementary Figure 1**) and CD44<sup>hi</sup>/CD24<sup>lo</sup>  
166 ratios (**Figure 1B, Supplementary Figure 2**) in MCF-7 cells stably expressing LXS (vector  
167 control), WT PELP1, or cytoplasmic (cyto) PELP1 cultured in either 2D (adherent) or 3D  
168 (tumorsphere) conditions. Relative to 2D, 3D conditions increased breast CSC markers in MCF-  
169 7 cells expressing LXS, WT PELP1, or cyto PELP1 (**Figure 1A, 1B**). In 2D conditions, cyto  
170 PELP1 expressing cells had no significant changes in ALDH activity when compared to LXS or

171 WT PELP1; however, 3D conditions significantly increased ALDH activity in cells expressing cyto  
172 PELP1 ( $12.0\% \pm 2.9$ ) compared to LXS<sub>N</sub> ( $6.6\% \pm 0.67$ ,  $p = 0.023$ ) and WT PELP1 ( $2.6\% \pm 0.76$ ,  
173  $p = 0.0015$ ). In 2D conditions, CD44<sup>hi</sup>/CD24<sup>lo</sup> populations were increased in cyto PELP1  
174 expressing cells ( $13.0\% \pm 0.49$ ) compared to LXS<sub>N</sub> ( $2.6\% \pm 0.042$ ,  $p < 0.0001$ ) or WT PELP1  
175 ( $1.2\% \pm 0.19$ ,  $p < 0.0001$ ), and this trend was enhanced in 3D conditions (cyto PELP1,  $19.4\% \pm$   
176  $1.4$ ; LXS<sub>N</sub>,  $9.0\% \pm 1.1$ ,  $p = 0.0045$ ; WT PELP1,  $2.3\% \pm 0.18$ ,  $p = 0.0011$ ). WT PELP1 displayed  
177 lower ALDH activity and CD44<sup>hi</sup>/CD24<sup>lo</sup> ratios relative to LXS<sub>N</sub> controls, suggesting that nuclear  
178 PELP1 limits CSC behavior. These results indicate that both 3D culture and cyto PELP1  
179 expression independently increase CSC expansion in MCF-7 cell models.

180

181 We performed RNA-seq on MCF-7 PELP1 models grown as 3D tumorspheres and compared  
182 these data to studies conducted in 2D culture (11) to identify candidate genes and pathways  
183 differentially regulated in cyto PELP1 expressing cells. Comparison of 3D versus 2D conditions  
184 identified 206 upregulated and 114 downregulated genes similarly regulated by >2-fold in all cell  
185 lines (LXS<sub>N</sub>, WT PELP1, cyto PELP1) (**Figure 1C, Supplementary Figure 3**). Ingenuity Pathway  
186 Analysis (IPA) of these 320 genes revealed activation of estrogen, growth factor, cytokine, and  
187 NF- $\kappa$ B pathways (**Supplementary Table 1**). Significantly activated and inhibited “Diseases and  
188 Functions” are summarized in **Supplementary Table 2**. 3D to 2D comparison in cyto PELP1  
189 expressing cells identified 173 differentially expressed genes (93 upregulated, 80 downregulated)  
190 compared to LXS<sub>N</sub> or WT PELP1 (**Figure 1C, Supplementary Figure 4**). These 173 genes were  
191 analyzed with IPA to identify cyto PELP1-specific pathways (**Figure 1D**), biological functions, or  
192 disease states (**Figure 1E**), and predicted increased HIF activation, estradiol, ATF4, and  
193 glycolytic-mediated pathways. We created representative heatmaps to illustrate 3D-specific  
194 regulation in upstream regulator analysis associated with HIF and ATF4 pathway activation (>2-  
195 fold; **Figure 1F**) and generated a cyto PELP1 upregulated gene signature (**Supplementary Table**  
196 **3**). Volcano plots of differentially regulated genes are shown in **Figure 1G**; red dots indicate genes  
197 in the cyto PELP1 signature. We then used the cyto PELP1 upregulated gene signature to query  
198 the METABRIC breast cancer database. Higher expression of this gene signature was associated  
199 with lower overall survival (OS) in the METABRIC cohort (hazard ratio = 1.485,  $p < 0.0001$ , **Figure**  
200 **1H**). We tested this on the ER+ only subtype within the METABRIC cohort and found similar  
201 results (hazard ratio = 1.483,  $p < 0.0001$ , **Figure 1I**). A similar query of the TCGA database  
202 revealed no significant differences in OS (**Supplementary Figure 5**). Taken together, these data  
203 identify genes involved in cyto PELP1-mediated pathways that promote CSCs, including those  
204 associated with HIF-activated and glycolytic pathways.

205

### 206 **Cytoplasmic PELP1 drives metabolic plasticity**

207 Next, we validated cyto PELP1 induced genes identified in our RNA-seq analysis. HIF activates  
208 the *PFKFB* family, which are metabolic bi-functional kinase/phosphatases (18). We found that  
209 mRNA levels of *EPAS1* (i.e. HIF2 $\alpha$ ), *PFKFB3*, and *PFKFB4* were upregulated in cells expressing  
210 cyto PELP1 relative to LXS or WT PELP1 in 3D, but not 2D conditions (**Figure 2A**). Additional  
211 validation of HIF-activated metabolic and stem cell genes include *NDRG1* and *SOX9* (**Figure 2A**).  
212 Given the central role of HIF pathways in metabolism (19), we investigated the effect of PELP1  
213 on metabolic pathways using the Seahorse Cell Energy Phenotype test to measure oxygen  
214 consumption rate (OCR) and extracellular acidification rate (ECAR). At baseline, MCF-7 cells  
215 expressing cyto PELP1 exhibited a significant increase in OCR levels compared to LXS and WT  
216 PELP1. Under stressed conditions (i.e. after FCCP and oligomycin), OCR was increased in cyto  
217 PELP1 expressing cells compared to LXS ( $p = 0.0096$ ). ECAR was significantly different in cyto  
218 PELP1 expressing cells compared to LXS at baseline, but WT and cyto PELP1 displayed an  
219 increase in ECAR compared to LXS controls ( $p = 0.046$  and  $0.0045$ ) under stressed conditions  
220 (**Figure 2B**). To systematically test effects on key parameters of mitochondrial function, we  
221 performed the Seahorse Mito Stress test. Cyto PELP1 expression significantly increased basal  
222 respiration, compared to LXS and WT PELP1 ( $p < 0.0001$  and  $0.0001$ ). Furthermore, cyto  
223 PELP1 increased ATP-linked respiration, proton leak, maximal respiration, and non-mitochondrial  
224 respiration (**Figure 2C**). Cyto PELP1 expressing cells had a 4-fold increase in glucose uptake  
225 compared to WT PELP1 and LXS, as measured by 2-NBDG (**Figure 2D, Supplementary**  
226 **Figure 7**). Collectively, these results indicate cyto PELP1 drives gene expression associated with  
227 HIF-activated metabolic programs (i.e. *PFKFB3*, *PFKFB4*) in 3D culture, and affects mitochondrial  
228 respiration and glycolysis, indicative of metabolic plasticity.

229

### 230 **Inhibition of PFKFBs disrupts PELP1/SRC-3 complexes and tumorsphere formation**

231 We hypothesized PFKFB3 and PFKFB4 are required components of the PELP1/SRC-3 complex.  
232 Co-immunoprecipitation of PFKFB3 or PFKFB4 demonstrated increased association with PELP1  
233 in cells expressing cyto PELP1 relative to LXS or WT PELP1 (**Figure 3A, 3B**). Treatment with  
234 PFK158 and 5MPN, inhibitors of PFKFB3 and PFKFB4 respectively, reduced the PELP1/SRC-3  
235 interaction (**Figure 3C, 3D**). These inhibitors also blocked PELP1/PFKFB3 and PELP1/PFKFB4  
236 (**Supplementary Figure 8A, 8B**) interactions in cyto PELP1 expressing cells; similar results were  
237 observed with another PFKFB3 inhibitor (PFK15; **Supplementary Figure 8C, 8D**).

238

239 Next, we tested the effect of PFKFB inhibition on cyto PELP1-induced tumorspheres. PFKFB4  
240 knockdown (**Supplementary Figure 9**) decreased tumorsphere formation in cyto PELP1  
241 expressing cells by ~50%, but not in LXSN or WT PELP1 (**Figure 3E**,  $p = 0.0103$ ). Attempts to  
242 stably knockdown PFKFB3 were not successful, suggesting that PFKFB3 is crucial for cell viability  
243 (20). Inhibitors of PFKFB3 and PFKFB4 reduced cyto PELP1-induced tumorspheres, but had no  
244 effect on cells expressing either LXSN or WT PELP1. (**Figure 3F, 3G; Supplementary Figure**  
245 **8E**). To evaluate PFKFB inhibitors in an alternative PELP1/SRC-3 model, we used a murine tumor  
246 cell line (J110) established from the MMTV-SRC-3 mouse (21). Similar to MCF-7 PELP1 models,  
247 PFK158 or 5MPN inhibited tumorsphere formation by ~40% in J110 cells (**Figure 3H**). Western  
248 blotting indicated that PFKFB3 and PFKFB4 protein levels remained unchanged in response to  
249 E2, while ER levels decreased, presumably due to ligand-induced turnover (**Figure 3H**, right).  
250 These results indicate that blocking PFKFB3 or PFKFB4 through knockdown or pharmacological  
251 inhibition disrupts expansion and self-renewal of PELP1-driven CSC populations.

252

### 253 **Targeting PELP1/SRC-3 complexes in therapy resistant cell lines**

254 Paclitaxel (Taxol) is a chemotherapy used to treat late stage breast cancer. Increased PELP1,  
255 HIF1 $\alpha$ , and HIF-2 $\alpha$  expression has been observed in triple negative breast cancer (TNBC) cells  
256 in response to Taxol (14). To evaluate whether PELP1 expression affects response to Taxol in  
257 ER+ breast cancer, we treated MCF-7 PELP1 cells (LXSN, WT PELP1, cyto PELP1) cultured as  
258 tumorspheres with Taxol (0 to 125 nM). We assessed tumorsphere formation and calculated IC50  
259 values for each cell line (**Figure 4A**). IC50 (Taxol) for cyto PELP1 expressing cells was ~2-fold  
260 higher than LXSN or WT PELP1. These results suggest that cyto PELP1 expression confers  
261 enhanced Taxol resistance compared to LXSN or WT PELP1.

262

263 Next, we determined if PELP1/SRC-3 signaling mediates therapy resistance in tamoxifen  
264 resistant (TamR) and paclitaxel-resistant (TaxR) cell lines. *EPAS1*, *PFKFB3*, and *PFKFB4* mRNA  
265 levels were increased in MCF-7 TaxR (**Figure 4B, top**) and TamR cells (**Figure 4B, bottom**)  
266 relative to MCF-7 parental controls, particularly in 3D conditions. 3D PELP1 target genes, *NDRG1*  
267 and *SOX9* were also upregulated in TaxR and TamR cells relative to parental MCF-7 cells  
268 (**Supplementary Figure 6**). To determine if similar changes in cellular metabolism occur in MCF-  
269 7 TaxR models, we performed Seahorse metabolic assays. The Cell Energy Phenotype test  
270 showed TaxR cells exhibit increased OCR and ECAR at baseline and stressed conditions relative  
271 to controls (**Figure 4C**), indicating increased mitochondrial respiration and glycolysis. To look at  
272 individual effects on OCR, we performed the Mito Stress test in MCF-7 TaxR models. Similar to



273 cyto PELP1 expressing cells, TaxR cells showed significant increases in basal and maximal  
274 respiration compared to controls (**Figure 4D**). TaxR cells increased proton leak, spare respiratory  
275 capacity, and non-mitochondrial respiration, but not ATP production as observed in MCF-7 cyto  
276 PELP1 expressing cells. TaxR cells also displayed ~2-fold increase ( $p = 0.0006$ ) in glucose  
277 uptake compared to controls (**Figure 4E**). Together, these data reveal that TamR and TaxR  
278 models phenocopy HIF-associated target gene expression and metabolic plasticity of MCF-7 cyto  
279 PELP1 expressing cells, and suggest PELP1 may be a key mediator in therapy resistance.

280

281 We found that the PELP1/SRC-3 interaction was similarly increased in MCF-7 TaxR (**Figure 4F**,  
282 top) and TamR cells (**Figure 4F**, bottom). Additionally, CD44<sup>hi</sup>/CD24<sup>lo</sup> ratios were increased in  
283 MCF-7 TaxR cells compared to parental controls (**Supplementary Figure 10**). To test the  
284 pharmacological effect of PFKFB3, PFKFB4, and SRC-3 inhibition, MCF-7 TaxR and TamR cells  
285 were seeded as tumorspheres and treated with PFK158, 5MPN, and SI-2. Both resistant models  
286 exhibited increased basal tumorsphere formation when compared to parental controls. 5MPN and  
287 SI-2 effectively decreased secondary tumorsphere formation by 71% and 75% in TaxR (**Figure**  
288 **4G**), and 88% and 92% in TamR models (**Figure 4H**) compared to vehicle controls. PFK158  
289 (PFKFB3 inhibitor) modestly decreased TaxR and TamR tumorspheres by 17% and 27%. These  
290 findings highlight the overlap of key players involved in PELP1-driven CSC biology and suggest  
291 that PFKFB4 and SRC-3 play a more significant role than PFKFB3 within resistant cell models.

292

293 We hypothesized that tam in combination with PELP1/SRC-3 complex inhibitors (i.e. SI-2 or  
294 5MPN) would be more effective than either inhibitor alone. Combination treatments were  
295 evaluated in several cell lines. In MCF-7 PELP1 models, we tested tam/SI-2, tam/5MPN, and SI-  
296 2/5MPN combinations (**Figure 5A-5C**). Tam/SI-2 and tam/5MPN reduced tumorsphere formation  
297 in cyto PELP1 expressing cells by ~85% ( $p < 0.0001$ ) and 80% ( $p < 0.0001$ ) compared to vehicle.  
298 Single agent treatment with tam or SI-2 also reduced tumorsphere, but to a lesser degree than  
299 combinations. PFK158 co-treatment with tam was not more effective than tam alone and was not  
300 further pursued (**Supplementary Figure 11A**). Effective combinations were then tested in J110  
301 cells (**Supplementary Figure 11B-11D**). Tam, SI-2, and 5MPN alone inhibited tumorspheres by  
302 39, 41, and 28%, while co-treatment did not have dramatic effects. The SI-2/5MPN combination  
303 was most effective in J110 cells, and decreased tumorsphere formation by 60%, most likely  
304 because J110 cells are an SRC-3-derived transgenic mouse mammary tumor cell line (22).

305

306 Because PELP1 confers tamoxifen and Taxol resistance (**Figure 4A**), we also tested the effect  
307 of these agents in resistant cell models. Similar to observations in MCF-7 PELP1 models, tam co-  
308 treatments were more effective when combined with SI-2 or 5MPN in MCF-7 TaxR models  
309 (**Figure 5D, 5E**). The SI-2/5MPN combination was not more effective than individual agents in  
310 TaxR models (**Figure 5F**), suggesting that SRC-3 and PFKFB4 cooperation occurs in tam-  
311 sensitive models. Accordingly, SI-2/5MPN co-treatment in MCF-7 and T47D TamR models  
312 reduced tumorsphere formation by 77% ( $p < 0.0001$ ) and 75% ( $p < 0.0001$ ) (**Supplementary**  
313 **Figure 11E, 11F**). These studies provide promising alternative approaches to target non-ER  
314 mediators and overcome emergence of chemotherapy and endocrine resistance.

315

### 316 **Targeting PELP1/SRC-3 complexes in PDxO and MIND models**

317 To explore the therapeutic potential of inhibitor combinations, we utilized pre-clinical patient-  
318 derived organoid models (PDxO; (23)). First, we identified two ER+ PDxO models (HCI-003, HCI-  
319 017) that express PELP1, SRC-3, PFKFB3, PFKFB4, and ER based on mRNA and protein levels  
320 (**Supplementary Figure 12, Figure 6A**). MCF-7 and T47D cell lines were included as controls.  
321 We tested effective combinations identified from **Figure 5** on CSC expansion in PDxO models.  
322 PDxOs were grown to maturity, pre-treated for 3 days, then dissociated and seeded into  
323 tumorspheres in the presence of inhibitors. Individual treatments (tam, SI-2, 5MPN) reduced  
324 tumorsphere formation in both PDxO models by 36 to 62% (**Figure 6B-6D**). The tam/SI-2  
325 combination was not more effective than individual treatment (**Figure 6B**). In contrast, tam/5MPN  
326 was more effective than tam or 5MPN alone and reduced tumorspheres by ~71% and ~90% in  
327 HCI-003 and HCI-017 (**Figure 6C**). SI-2/5MPN co-treatment was more effective than SI-2 or  
328 5MPN alone and reduced tumorsphere formation by ~71% ( $p < 0.0001$ ) and ~74% ( $p < 0.0001$ )  
329 in HCI-003 and HCI-017 (**Figure 6D**). These results demonstrate that blocking the PELP1/SRC-  
330 3 complex and associated binding partners is an effective approach to targeting CSC populations  
331 in pre-clinical PDxO models.

332

333 To evaluate if PELP1 promotes tumor formation, we injected MCF-7 WT and cyto PELP1  
334 expressing cells ( $5 \times 10^4$ ) into the inguinal mammary glands of adult female mice (6-8 week old,  
335 4 mice/group) to generate mammary intraductal (MIND) tumors. Both cell lines had 100%  
336 engraftment rates (**Figure 7A, Supplementary Figure 13**). Tumor area (%) was calculated from  
337 H&E images of each mammary gland and was increased in cyto PELP1 ( $25.7\% \pm 16.5$ ) compared  
338 to WT PELP1 tumors ( $10.9\% \pm 9.5$ ,  $p = 0.046$ ) (**Figure 7B**).

339

340 Our PDxO data showed that 5MPN co-treatment with SI-2 or tam decreased tumorspheres. We  
341 queried PFKFB4 mRNA levels on OS in METABRIC datasets. High PFKFB4 mRNA expression  
342 is associated with decreased OS in all subtypes and ER+ only patient cohorts (**Supplementary**  
343 **Figure 14**). Therefore, we tested whether PFKFB4 knockdown would impact MIND tumor growth  
344 or the presence of circulating tumor cells (CTCs); a marker of metastatic potential and associated  
345 CSC behavior (24,25). 5 mice/group were injected with MCF-7 WT and cyto PELP1 expressing  
346 cells (shGFP control or shPFKFB4). 8 weeks post-injection, mammary glands were fixed and  
347 processed for H&E staining (**Supplementary Figure 15**). As in **Figure 7B**, the difference in  
348 means between WT PELP1 shGFP ( $26.8\% \pm 10.2$ ) and cyto PELP1 shGFP ( $41.2\% \pm 17.2$ ) tumor  
349 area was significant ( $p = 0.036$ , **Figure 7C**). Knockdown of PFKFB4 in MCF-7 cells expressing  
350 WT PELP1 or cyto PELP1 did not have a significant effect on primary tumor growth. To assess  
351 disseminated tumor cells, blood samples were collected during euthanization and seeded into  
352 soft agar assays to detect CTCs. Mice injected with WT PELP1 (shGFP or shPFKFB4) expressing  
353 cells did not exhibit CTC colony formation. In sharp contrast, blood samples from mice engrafted  
354 with cyto PELP1 cells developed colonies, indicating the presence of CTCs. Knockdown of  
355 shPFKFB4 in MCF-7 cyto PELP1 expressing cells reduced colony formation ( $p < 0.0492$ ) and  
356 colony size ( $p < 0.0016$ ) (**Figure 7D-7F**). These data demonstrate a requirement for PFKFB4 in  
357 cyto PELP1-driven CTC formation and expansion *in vivo*.

358  
359

## 360 **DISCUSSION**

361 The CSC hypothesis postulates that tumors contain a subset population (i.e. CSCs) that share  
362 properties of normal stem cells including self-renewal, differentiation, and capacity to repopulate  
363 the heterogeneous tumor (9). CSCs are proposed to have heightened resistance to cancer  
364 therapies due to their relative quiescent state (26), enabling this population to evade standard of  
365 care treatments that target proliferating bulk tumor cells. Herein, we sought to define mechanisms  
366 of SR co-activator driven CSC survival and expansion in ER+ breast cancer. We conclude that  
367 SR co-activator complexes enhance CSC activity and therapy resistance by promoting metabolic  
368 plasticity. Inhibiting these complexes and/or associated binding partners in combination with  
369 endocrine therapies may be an effective strategy to block CSC survival and self-renewal, and  
370 breast cancer progression.

371

372 Our findings further implicate PELP1/SRC-3 complexes as mediators of CSC activity. We  
373 observed similarities in gene expression, cell metabolism, and sensitivity to inhibitors of PELP1

374 binding partners in endocrine and chemotherapy resistant ER+ cell lines. Although PELP1  
375 expression contributes to cell survival in response to Taxol in TNBC (14), our studies are the first  
376 to demonstrate enhanced Taxol tolerance in the context of cyto PELP1 in ER+ breast cancer. Our  
377 results in TaxR models highlight the impact of targeting PELP1 binding partners involved in  
378 PELP1-mediated CSC self-renewal (**Figure 4**). Mesenchymal stem cells (27) and ovarian cancer  
379 cells (28) achieve Taxol resistance by shifting to G0 and entering quiescence. PELP1 is a  
380 substrate of CDKs and modulates G1/S cell cycle progression (29). PELP1 may confer Taxol  
381 resistance in part through cell cycle regulation, albeit further studies are needed to define  
382 cytoplasmic PELP1-specific contributions in this context.

383

384 Contributing factors to CSC survival include metabolic plasticity, which enables adaptation to  
385 diverse tumor environments. For example, inhibition of glycolysis reduces breast and lung CSCs  
386 (30). Glycolytic reprogramming has been documented in breast cancer cells during EMT, resulting  
387 in acquisition of CSC-like characteristics and tumorigenicity (31). In contrast, breast CSCs utilize  
388 oxidative phosphorylation (OXPHOS) as their primary metabolic program (32). Bulk tumor cells  
389 depend chiefly on glycolysis, whereas tumors enriched for breast CSCs rely mainly on OXPHOS  
390 (33). RNA-seq analysis indicated cytoplasmic PELP1 imparts increased HIF-activated pathways  
391 under normoxic 3D conditions to enrich for CSCs. ChIP assays demonstrated *EPAS1* (i.e. HIF-  
392  $2\alpha$ ) recruitment to HRE regions of the PELP1 promoter in TNBC cells (34). Thus, PELP1-induced  
393 HIF pathways may serve as a feed-forward mechanism to drive metabolic genes programs.  
394 PFKFB3 and PFKFB4 are required for glycolytic response to hypoxia via HIF-1 $\alpha$  activation (18).  
395 We demonstrated that cyto PELP1 expressing cells increased glycolysis and mitochondrial  
396 respiration. Additional studies are needed to define the bioenergetics driving this plasticity.  
397 PFKFB4-mediated SRC-3 Ser857 phosphorylation has essential functions in lung and breast  
398 cancer metastasis and metabolism (35). Phosphorylation of SRC-3 Ser857 promotes SRC-3  
399 association with transcription factor *ATF4* to mediate non-oxidative pentose phosphate pathway  
400 and purine synthesis. This study (35) did not evaluate SRC-3 in the context of CSCs, although  
401 SRC-3 has been linked to CSC activity (10,11). *ATF4* pathway activation was identified by IPA in  
402 our studies (**Figure 1**) and could explain the correlation between PFKFB4 and PELP1/SRC-3-  
403 driven CSCs.

404

405 PFKFB inhibitors are emerging as promising treatments in endocrine and chemotherapy-resistant  
406 ER+ breast cancer (36). PFKFB3 inhibitor, PFK158, displays broad anti-tumor and  
407 immunomodulatory effects in human and preclinical mouse models (37) and was evaluated in a

408 Phase I clinical trial with no significant adverse effects (38). The prognostic value of PFKFB4  
409 expression was evaluated in 200 tumor samples from stage I to III breast cancer patients. Similar  
410 to our METABRIC analysis (**Supplementary Figure 14**), elevated PFKFB4 expression was  
411 associated with poor disease-free survival and overall survival in ER+, HER2+, or TNBC patients  
412 (39). PFKFB4 inhibitors (e.g. 5MPN) have not yet moved to clinical trials. Studies have suggested  
413 correlative and mechanistic links between PFKFBs and CSCs. *PFKFB3* was upregulated in a  
414 CD44<sup>hi</sup>CD24<sup>lo</sup> gene signature correlated to risk of distant metastasis and poor outcome in breast  
415 cancer patients (40). A cleaved product of CD44 (CD44ICD) promoted breast cancer stemness  
416 via PFKFB4-mediated glycolysis (41). Notably, 5MPN treatment suppressed CD44ICD-induced  
417 tumorigenesis. We have further implicated PFKFBs as drivers of CSC activity by demonstrating  
418 5MPN reduces tumorspheres as a single agent or in combination treatments in multiple ER+  
419 breast cancer models, including treatment resistant cells (TaxR, TamR), murine tumor cells, and  
420 pre-clinical PDXOs. Studies in breast cancer patients indicate that EMT and CSC markers are  
421 present in CTC populations, which have high metastatic potential. (42). Our MIND xenografts  
422 demonstrate PFKFB4 knockdown reduces CTC populations (**Figure 7**). These data suggest  
423 PFKFB4 inhibition is an effective strategy for targeting CSCs and CTCs in ER+ breast cancer.  
424 Future work should involve assessing overlap between PFKFB4-modulated CSC and CTC  
425 populations by evaluating the impact of 5MPN inhibitor combinations *in vivo*.

426  
427 To evaluate the impact of SR co-activators on CSCs, it is important to consider ER-driven  
428 contributions. Breast CSCs are reported to be mostly ER negative (43), which may explain their  
429 poor response to anti-estrogens. However, SR+ cells contribute to CSC biology through SR-  
430 dependent (namely PR) paracrine factors (44). For example, breast CSC self-renewal was  
431 stimulated after anti-estrogen treatment of breast cancer cells or PDX models (45,46). These  
432 studies suggest anti-estrogen therapies may initially slow tumor growth, but concurrently evoke  
433 plasticity and CSC activity in non-proliferative tumor cells. Notably, PELP1-containing complexes  
434 include ER and PR (47). PRs but not ER are potent drivers of stem and progenitor cell expansion  
435 in normal and neoplastic breast tissues (48). We have recently defined a requirement for  
436 phosphorylated and inducible PR in CSC biology (49,50), insulin hypersensitivity, and tam  
437 resistance in ER+ breast cancer (13). CSC outgrowth in therapy resistant ER+/PR-low breast  
438 cancer models is blocked by PR knockdown or antiprogestins (13). These findings suggest  
439 PELP1/SRC-3 complexes enable constitutive SR activity in sub-populations that easily bypass  
440 endocrine therapies. Antagonizing estrogen signaling may select for cells that display ligand-  
441 independent ER, resulting in increased proportions of breast CSCs, and subsequently promote

442 metastasis. Therefore, treatment should include endocrine therapy in combination with targeted  
443 therapies that block mediators of CSC survival and self-renewal as defined herein (i.e. PFKFBs).

444

445

## 446 CONCLUSION

447 Our work demonstrates that targeting SR co-activators and associated binding partners involved  
448 in driving CSC survival, self-renewal, and metabolic plasticity may impede breast cancer  
449 progression and has the potential to lead to improved outcomes. Identifying the mechanisms that  
450 mediate recurrent ER+ tumor cell populations (e.g. CSCs, CTCs) will enable specific targeting  
451 within heterogeneous breast tumors to overcome endocrine and chemotherapy resistance.

452

453

## 454 ACKNOWLEDGEMENTS

455 This work was supported by NIH grants R01 CA236948 (JHO, CAL), F32 CA210340 (THT), T32  
456 HL007741 (THT), and U54 CA224076 (BWW), ACS Institutional Research Grant #124166-IRG-  
457 58-001-52-IRG5 (JHO), University of Minnesota Masonic Cancer Center (CAL, JHO), National  
458 Center for Advancing Translational Sciences of the NIH Award UL1TR000114 (JHO), and  
459 Department of Defense W81XWH-14-1-0417 (BWW). We thank Bruce Lindgren for biostatistics  
460 support, and the Masonic Cancer Center Biostatistics and Bioinformatics, Analytical Biochemistry,  
461 and Flow Cytometry shared resources. We also thank Zohar Sachs and Michael Franklin for  
462 critical reading of this manuscript.

463

464

## 465 FIGURE LEGENDS

466 **Figure 1.** PELP1-induced gene expression is altered in 3D conditions. **(A)** ALDH activity and **(B)**  
467 CD44<sup>hi</sup>/CD24<sup>lo</sup> populations in MCF-7 PELP1 cells. **(C)** Venn diagrams showing unique genes up  
468 or downregulated >2-fold in MCF-7 PELP1 cells (3D vs. 2D). IPA analysis of **(D)** upstream  
469 regulators and **(E)** diseases or functions. **(F)** Representative heat-map showing log<sub>2</sub>(FPKM)  
470 values of cyto PELP1 gene signature. **(G)** Volcano plots of 3D vs. 2D comparison of MCF-7  
471 PELP1 cells. X-axis is Log<sub>2</sub>(fold change) and Y-axis represent -Log<sub>10</sub> Benjamini-Hochberg  
472 corrected Q-values. Kaplan-Meier curves for upper and lower 50<sup>th</sup> percentile of cyto PELP1 gene  
473 signature expression in the METABRIC **(H)** all subtypes and **(I)** ER+ only patient cohorts. Graphed  
474 data represent the mean ± SD (n = 3). \* p < 0.05, \*\* p < 0.01, \*\*\* p < 0.001.

475

476 **Figure 2.** PELP1 cytoplasmic signaling upregulates HIF-activated metabolic pathways. **(A)** mRNA  
477 levels of *EPAS1*, *PFKFB3*, *PFKFB4*, *NDRG1*, and *SOX9* in MCF-7 PELP1 cells. **(B)** OCR and  
478 ECAR rates measured in MCF-7 PELP1 cells by Seahorse Cell Energy Phenotype test. **(C)** OCR  
479 rates measured in MCF-7 PELP1 cells by Seahorse Mito Stress test. **(D)** Glucose uptake in cells  
480 treated with 2-NBDG (10  $\mu$ M). 2-NBDG uptake is represented as % cells relative to control.  
481 Graphed data represent the mean  $\pm$  SD (n = 3). \* p < 0.05, \*\* p < 0.01, \*\*\* p < 0.001.

482  
483 **Figure 3.** PFKFB inhibition blocks PELP1/SRC-3 signaling. Co-immunoprecipitation of **(A)** PELP1  
484 and PFKFB3 or **(B)** PFKFB4 in MCF-7 PELP1 cells. Co-immunoprecipitation of PELP1 and SRC-  
485 3 in MCF-7 PELP1 cells treated with vehicle (DMSO), **(C)** PFK158 (100 nM), or **(D)** 5MPN (5  $\mu$ M).  
486 Cell lysate controls (*right*). **(E)** Secondary tumorsphere assays in MCF-7 PELP1 shGFP control  
487 or shPFKFB4 knockdown cells. Secondary tumorsphere assays in MCF-7 PELP1 cells treated  
488 with vehicle, **(F)** PFK158 or **(G)** 5MPN. **(H)** Secondary tumorsphere assays in J110 cells treated  
489 with vehicle, PFK158, or 5MPN. Western blot shows PFKFB3 and PFKFB4 protein in J110 cells.  
490 Graphed data represent the mean  $\pm$  SD (n = 3). \* p < 0.05, \*\* p < 0.01, \*\*\* p < 0.001.

491  
492 **Figure 4.** Therapy resistant models phenocopy cyto PELP1 cancer biology. **(A)** Taxol dose  
493 response in MCF-7 PELP1 cells (0-125 nM Taxol). **(B)** mRNA levels of *EPAS1*, *PFKFB3*, and  
494 *PFKFB4* in MCF-7 TaxR (*top*) or TamR (*bottom*) cells cultured in 2D or 3D conditions. **(C)** OCR  
495 and ECAR rates measured in MCF-7 TaxR cells by Seahorse Cell Energy Phenotype test. **(D)**  
496 OCR rates measured in MCF-7 TaxR cells by Seahorse Mito Stress test. **(E)** Glucose uptake in  
497 cells treated with 2-NBDG (10  $\mu$ M). **(F)** Co-immunoprecipitation of PELP1 and SRC-3 in MCF-7  
498 TaxR (*top*) or TamR (*bottom*) cells. Secondary tumorsphere assays in **(G)** MCF-7 TaxR and **(H)**  
499 MCF-7 TamR cells treated with vehicle (DMSO), PFK158 (100 nM), 5MPN (5  $\mu$ M), or SI-2 (100  
500 nM). Graphed data represent the mean  $\pm$  SD (n = 3). \* p < 0.05, \*\* p < 0.01, \*\*\* p < 0.001.

501  
502 **Figure 5.** Endocrine therapies exhibit combinatorial effects with PELP1 complex inhibitors.  
503 Tumorsphere assays in MCF-7 PELP1 cells treated with: **(A)** tam/SI-2, **(B)** tam/5MPN, or **(C)** SI-  
504 2/5MPN. Tumorsphere assays in MCF-7 TaxR cells treated with: **(D)** tam/SI-2, **(E)** tam/5MPN, or  
505 **(F)** SI-2/5MPN. Concentrations: tam (100 nM), 5MPN (5  $\mu$ M), SI-2 (100 nM). Graphed data  
506 represent the mean  $\pm$  SD (n = 3). \* p < 0.05, \*\* p < 0.01, \*\*\* p < 0.001.

507  
508 **Figure 6.** Co-treatments in preclinical ER+ PDxO models target CSCs. **(A)** Western blot of  
509 PELP1, SRC-3, PFKFB3, PFKFB4, and ER protein levels in HCI-003 and HCI-017. Tumorsphere

510 assays in HCI-003 and HCI-017 PDxOs co-treated with **(B)** tam/SI-2, **(C)** tam/5MPN, or **(D)** SI-  
511 2/5MPN. Prior to assay, PDxO models were pre-treated with the indicated compounds for 3 days  
512 and subjected to continued treatment during the assay. Concentrations: tam (100 nM), 5MPN (5  
513  $\mu$ M), SI-2 (100 nM). Graphed data represent the mean  $\pm$  SD (n = 3). \* p < 0.05, \*\* p < 0.01, \*\*\* p  
514 < 0.001.

515  
516 **Figure 7.** PFKFB4 knockdown abrogates cyto PELP1 CTCs in MIND xenograft models. **(A)**  
517 Representative H&E stains from MIND glands (WT and cyto PELP1). **(B)** Tumor area (%)  
518 calculated from H&E sections from **(A)**. **(C)** Tumor area (%) calculated from H&E sections from  
519 WT and cyto PELP1 (shGFP, shPFKFB4) MIND glands. **(D)** Representative images of CTCs from  
520 blood samples collected from mice injected with WT or cyto PELP1 (shGFP, shPFKFB4) cells.  
521 **(E)** Average size of soft agar colonies (CTCs) from **(D)**. **(F)** Average number of colonies/well  
522 (CTCs). Graphed data represent the mean  $\pm$  SD (n = 5). \* p < 0.05, \*\* p < 0.01, \*\*\* p < 0.001  
523  
524

## 525 REFERENCES

- 526 1. Vadlamudi RK, Wang RA, Mazumdar A, Kim Y, Shin J, Sahin A, et al. Molecular cloning  
527 and characterization of PELP1, a novel human coregulator of estrogen receptor alpha. *J*  
528 *Biol Chem* 2001;276(41):38272-9.
- 529 2. Xu J, Liao L, Ning G, Yoshida-Komiya H, Deng C, O'Malley BW. The steroid receptor  
530 coactivator SRC-3 (p/CIP/RAC3/AIB1/ACTR/TRAM-1) is required for normal growth,  
531 puberty, female reproductive function, and mammary gland development. *Proc Natl*  
532 *Acad Sci U S A* 2000;97(12):6379-84.
- 533 3. Habashy HO, Powe DG, Rakha EA, Ball G, Macmillan RD, Green AR, et al. The prognostic  
534 significance of PELP1 expression in invasive breast cancer with emphasis on the ER-  
535 positive luminal-like subtype. *Breast Cancer Res Treat* 2010;120(3):603-12.
- 536 4. Kumar R, Zhang H, Holm C, Vadlamudi RK, Landberg G, Rayala SK. Extranuclear  
537 coactivator signaling confers insensitivity to tamoxifen. *Clin Cancer Res*  
538 2009;15(12):4123-30.
- 539 5. Vadlamudi RK, Manavathi B, Balasenthil S, Nair SS, Yang Z, Sahin AA, et al. Functional  
540 implications of altered subcellular localization of PELP1 in breast cancer cells. *Cancer Res*  
541 2005;65(17):7724-32.
- 542 6. Burandt E, Jens G, Holst F, Janicke F, Muller V, Quaas A, et al. Prognostic relevance of  
543 AIB1 (NCoA3) amplification and overexpression in breast cancer. *Breast Cancer Res*  
544 *Treat* 2013;137(3):745-53.
- 545 7. Louie MC, Zou JX, Rabinovich A, Chen HW. ACTR/AIB1 functions as an E2F1 coactivator  
546 to promote breast cancer cell proliferation and antiestrogen resistance. *Mol Cell Biol*  
547 2004;24(12):5157-71.



- 548 8. Osborne CK, Bardou V, Hopp TA, Chamness GC, Hilsenbeck SG, Fuqua SA, et al. Role of  
549 the estrogen receptor coactivator AIB1 (SRC-3) and HER-2/neu in tamoxifen resistance  
550 in breast cancer. *J Natl Cancer Inst* 2003;95(5):353-61.
- 551 9. Visvader JE, Lindeman GJ. Cancer stem cells: current status and evolving complexities.  
552 *Cell Stem Cell* 2012;10(6):717-28.
- 553 10. Rohira AD, Yan F, Wang L, Wang J, Zhou S, Lu A, et al. Targeting SRC Coactivators Blocks  
554 the Tumor-Initiating Capacity of Cancer Stem-like Cells. *Cancer Res* 2017;77(16):4293-  
555 304.
- 556 11. Truong TH, Hu H, Temiz NA, Hagen KM, Girard BJ, Brady NJ, et al. Cancer Stem Cell  
557 Phenotypes in ER(+) Breast Cancer Models Are Promoted by PELP1/AIB1 Complexes.  
558 *Mol Cancer Res* 2018;16(4):707-19.
- 559 12. Yang Y, Chan JY, Temiz NA, Yee D. Insulin Receptor Substrate Suppression by the  
560 Tyrphostin NT157 Inhibits Responses to Insulin-Like Growth Factor-I and Insulin in  
561 Breast Cancer Cells. *Horm Cancer* 2018;9(6):371-82.
- 562 13. Dwyer AR, Truong TH, Perez Kerkvliet C, Paul KV, Kabos P, Sartorius CA, et al. Insulin  
563 Receptor Substrate-1 (IRS-1) Mediates Progesterone Receptor-Driven Stemness and  
564 Endocrine Resistance in Estrogen Receptor+ Breast Cancer *Br J Cancer* 2020;Manuscript  
565 Accepted.
- 566 14. Regan Anderson TM, Ma S, Perez Kerkvliet C, Peng Y, Helle TM, Krutilina RI, et al. Taxol  
567 Induces Brk-dependent Prosurvival Phenotypes in TNBC Cells through an AhR/GR/HIF-  
568 driven Signaling Axis. *Mol Cancer Res* 2018;16(11):1761-72.
- 569 15. Behbod F, Kittrell FS, LaMarca H, Edwards D, Kerbawy S, Heestand JC, et al. An  
570 intraductal human-in-mouse transplantation model mimics the subtypes of ductal  
571 carcinoma in situ. *Breast Cancer Res* 2009;11(5):R66.
- 572 16. Sflomos G, Dormoy V, Metsalu T, Jeitziner R, Battista L, Scabia V, et al. A Preclinical  
573 Model for ERalpha-Positive Breast Cancer Points to the Epithelial Microenvironment as  
574 Determinant of Luminal Phenotype and Hormone Response. *Cancer Cell*  
575 2016;29(3):407-22.
- 576 17. Liu Y, Nenutil R, Appleyard MV, Murray K, Boylan M, Thompson AM, et al. Lack of  
577 correlation of stem cell markers in breast cancer stem cells. *Br J Cancer*  
578 2014;110(8):2063-71.
- 579 18. Chesney J, Clark J, Klarer AC, Imbert-Fernandez Y, Lane AN, Telang S. Fructose-2,6-  
580 bisphosphate synthesis by 6-phosphofructo-2-kinase/fructose-2,6-bisphosphatase 4  
581 (PFKFB4) is required for the glycolytic response to hypoxia and tumor growth.  
582 *Oncotarget* 2014;5(16):6670-86.
- 583 19. Kim JW, Dang CV. Cancer's molecular sweet tooth and the Warburg effect. *Cancer Res*  
584 2006;66(18):8927-30.
- 585 20. Shi L, Pan H, Liu Z, Xie J, Han W. Roles of PFKFB3 in cancer. *Signal Transduct Target Ther*  
586 2017;2:17044.
- 587 21. Torres-Arzayus MI, Font de Mora J, Yuan J, Vazquez F, Bronson R, Rue M, et al. High  
588 tumor incidence and activation of the PI3K/AKT pathway in transgenic mice define AIB1  
589 as an oncogene. *Cancer Cell* 2004;6(3):263-74.

- 590 22. Torres-Arzayus MI, Yuan J, DellaGatta JL, Lane H, Kung AL, Brown M. Targeting the AIB1  
591 oncogene through mammalian target of rapamycin inhibition in the mammary gland.  
592 *Cancer Res* 2006;66(23):11381-8.
- 593 23. Guillen KP, Fujita M, Butterfield AJ, Welm BW. Manuscript in Preparation. 2020.
- 594 24. Kilgour E, Rothwell DG, Brady G, Dive C. Liquid Biopsy-Based Biomarkers of Treatment  
595 Response and Resistance. *Cancer Cell* 2020;37(4):485-95.
- 596 25. Budd GT, Cristofanilli M, Ellis MJ, Stopeck A, Borden E, Miller MC, et al. Circulating  
597 tumor cells versus imaging--predicting overall survival in metastatic breast cancer. *Clin*  
598 *Cancer Res* 2006;12(21):6403-9.
- 599 26. Moore N, Lyle S. Quiescent, slow-cycling stem cell populations in cancer: a review of the  
600 evidence and discussion of significance. *J Oncol* 2011;2011.
- 601 27. Bosco DB, Kenworthy R, Zorio DA, Sang QX. Human mesenchymal stem cells are  
602 resistant to Paclitaxel by adopting a non-proliferative fibroblastic state. *PLoS One*  
603 2015;10(6):e0128511.
- 604 28. Wang X, Pan L, Mao N, Sun L, Qin X, Yin J. Cell-cycle synchronization reverses Taxol  
605 resistance of human ovarian cancer cell lines. *Cancer Cell Int* 2013;13(1):77.
- 606 29. Nair BC, Nair SS, Chakravarty D, Challa R, Manavathi B, Yew PR, et al. Cyclin-dependent  
607 kinase-mediated phosphorylation plays a critical role in the oncogenic functions of  
608 PELP1. *Cancer Res* 2010;70(18):7166-75.
- 609 30. O'Neill S, Porter RK, McNamee N, Martinez VG, O'Driscoll L. 2-Deoxy-D-Glucose inhibits  
610 aggressive triple-negative breast cancer cells by targeting glycolysis and the cancer stem  
611 cell phenotype. *Sci Rep* 2019;9(1):3788.
- 612 31. Dong C, Yuan T, Wu Y, Wang Y, Fan TW, Miriyala S, et al. Loss of FBP1 by Snail-mediated  
613 repression provides metabolic advantages in basal-like breast cancer. *Cancer Cell*  
614 2013;23(3):316-31.
- 615 32. Vlashi E, Lagadec C, Vergnes L, Reue K, Frohnen P, Chan M, et al. Metabolic differences  
616 in breast cancer stem cells and differentiated progeny. *Breast Cancer Res Treat*  
617 2014;146(3):525-34.
- 618 33. Banerjee A, Arvinrad P, Darley M, Laversin SA, Parker R, Rose-Zerilli MJJ, et al. The  
619 effects of restricted glycolysis on stem-cell like characteristics of breast cancer cells.  
620 *Oncotarget* 2018;9(33):23274-88.
- 621 34. Regan Anderson TM, Ma SH, Raj GV, Cidlowski JA, Helle TM, Knutson TP, et al. Breast  
622 Tumor Kinase (Brk/PTK6) Is Induced by HIF, Glucocorticoid Receptor, and PELP1-  
623 Mediated Stress Signaling in Triple-Negative Breast Cancer. *Cancer Res* 2016;76(6):1653-  
624 63.
- 625 35. Dasgupta S, Rajapakshe K, Zhu B, Nikolai BC, Yi P, Putluri N, et al. Metabolic enzyme  
626 PFKFB4 activates transcriptional coactivator SRC-3 to drive breast cancer. *Nature*  
627 2018;556(7700):249-54.
- 628 36. Mondal S, Roy D, Sarkar Bhattacharya S, Jin L, Jung D, Zhang S, et al. Therapeutic  
629 targeting of PFKFB3 with a novel glycolytic inhibitor PFK158 promotes lipophagy and  
630 chemosensitivity in gynecologic cancers. *Int J Cancer* 2019;144(1):178-89.
- 631 37. Telang S, Yaddanapudi K, Grewal J, Redman R, Fu S, Pohlmann P, et al. Abstract B90:  
632 PFK-158 is a first-in-human inhibitor of PFKFB3 that selectively suppresses glucose

- 633 metabolism of cancer cells and inhibits the immunosuppressive Th17 cells and MDSCs in  
634 advanced cancer patients. *Cancer Res* 2016;76(24 Supplement):B90.
- 635 38. Redman R, Pohlmann P, Kurman M, Tapolsky GH, Chesney J. Abstract CT206: PFK-158,  
636 first-in-man and first-in-class inhibitor of PFKFB3/ glycolysis: A phase I, dose escalation,  
637 multi-center study in patients with advanced solid malignancies. *Cancer Res* 2015;75(15  
638 Supplement):CT206.
- 639 39. Yao L, Wang L, Cao ZG, Hu X, Shao ZM. High expression of metabolic enzyme PFKFB4 is  
640 associated with poor prognosis of operable breast cancer. *Cancer Cell Int* 2019;19:165.
- 641 40. Marotta LL, Almendro V, Marusyk A, Shipitsin M, Schemme J, Walker SR, et al. The  
642 JAK2/STAT3 signaling pathway is required for growth of CD44(+)CD24(-) stem cell-like  
643 breast cancer cells in human tumors. *J Clin Invest* 2011;121(7):2723-35.
- 644 41. Gao R, Li D, Xun J, Zhou W, Li J, Wang J, et al. CD44/ICD promotes breast cancer stemness  
645 via PFKFB4-mediated glucose metabolism. *Theranostics* 2018;8(22):6248-62.
- 646 42. Giordano A, Gao H, Anfossi S, Cohen E, Mego M, Lee BN, et al. Epithelial-mesenchymal  
647 transition and stem cell markers in patients with HER2-positive metastatic breast  
648 cancer. *Mol Cancer Ther* 2012;11(11):2526-34.
- 649 43. Harrison H, Simoes BM, Rogerson L, Howell SJ, Landberg G, Clarke RB. Oestrogen  
650 increases the activity of oestrogen receptor negative breast cancer stem cells through  
651 paracrine EGFR and Notch signalling. *Breast Cancer Res* 2013;15(2):R21.
- 652 44. Joshi PA, Jackson HW, Beristain AG, Di Grappa MA, Mote PA, Clarke CL, et al.  
653 Progesterone induces adult mammary stem cell expansion. *Nature* 2010;465(7299):803-  
654 7.
- 655 45. Simoes BM, O'Brien CS, Eyre R, Silva A, Yu L, Sarmiento-Castro A, et al. Anti-estrogen  
656 Resistance in Human Breast Tumors Is Driven by JAG1-NOTCH4-Dependent Cancer Stem  
657 Cell Activity. *Cell Rep* 2015;12(12):1968-77.
- 658 46. Shea MP, O'Leary KA, Fakhraldeen SA, Goffin V, Friedl A, Wisinski KB, et al. Antiestrogen  
659 Therapy Increases Plasticity and Cancer Stemness of Prolactin-Induced ERalpha(+)  
660 Mammary Carcinomas. *Cancer Res* 2018;78(7):1672-84.
- 661 47. Daniel AR, Gaviglio AL, Knutson TP, Ostrander JH, D'Assoro AB, Ravindranathan P, et al.  
662 Progesterone receptor-B enhances estrogen responsiveness of breast cancer cells via  
663 scaffolding PELP1- and estrogen receptor-containing transcription complexes. *Oncogene*  
664 2015;34(4):506-15.
- 665 48. Rajaram RD, Buric D, Caikovski M, Ayyanan A, Rougemont J, Shan J, et al. Progesterone  
666 and Wnt4 control mammary stem cells via myoepithelial crosstalk. *EMBO J*  
667 2015;34(5):641-52.
- 668 49. Knutson TP, Truong TH, Ma S, Brady NJ, Sullivan ME, Raj G, et al. Posttranslationally  
669 modified progesterone receptors direct ligand-specific expression of breast cancer stem  
670 cell-associated gene programs. *J Hematol Oncol* 2017;10(1):89.
- 671 50. Truong TH, Dwyer AR, Diep CH, Hu H, Hagen KM, Lange CA. Phosphorylated  
672 Progesterone Receptor Isoforms Mediate Opposing Stem Cell and Proliferative Breast  
673 Cancer Cell Fates. *Endocrinology* 2019;160(2):430-46.
- 674

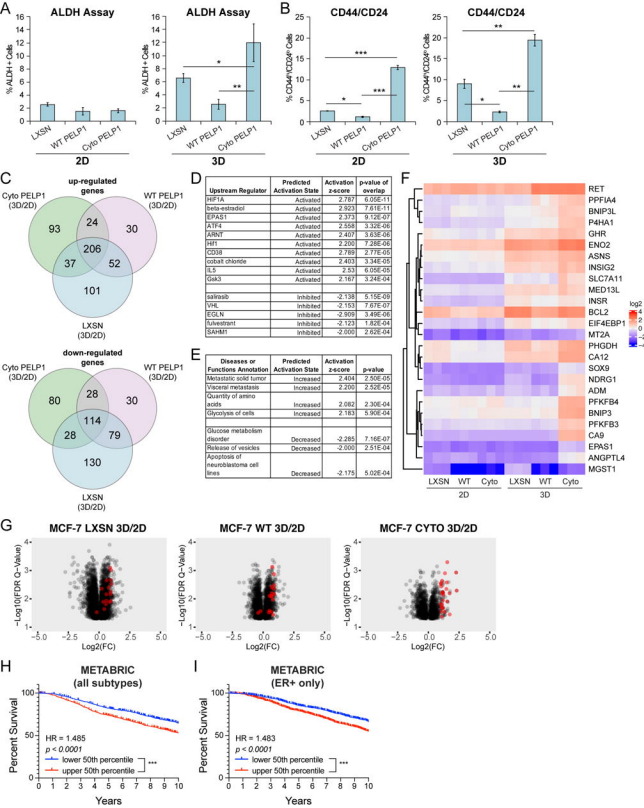

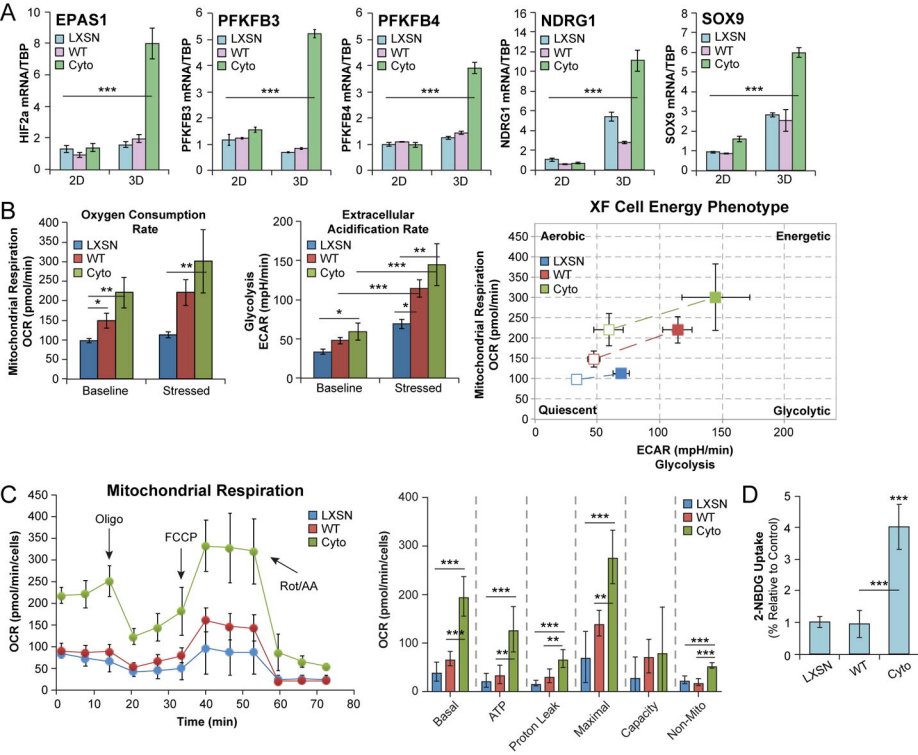

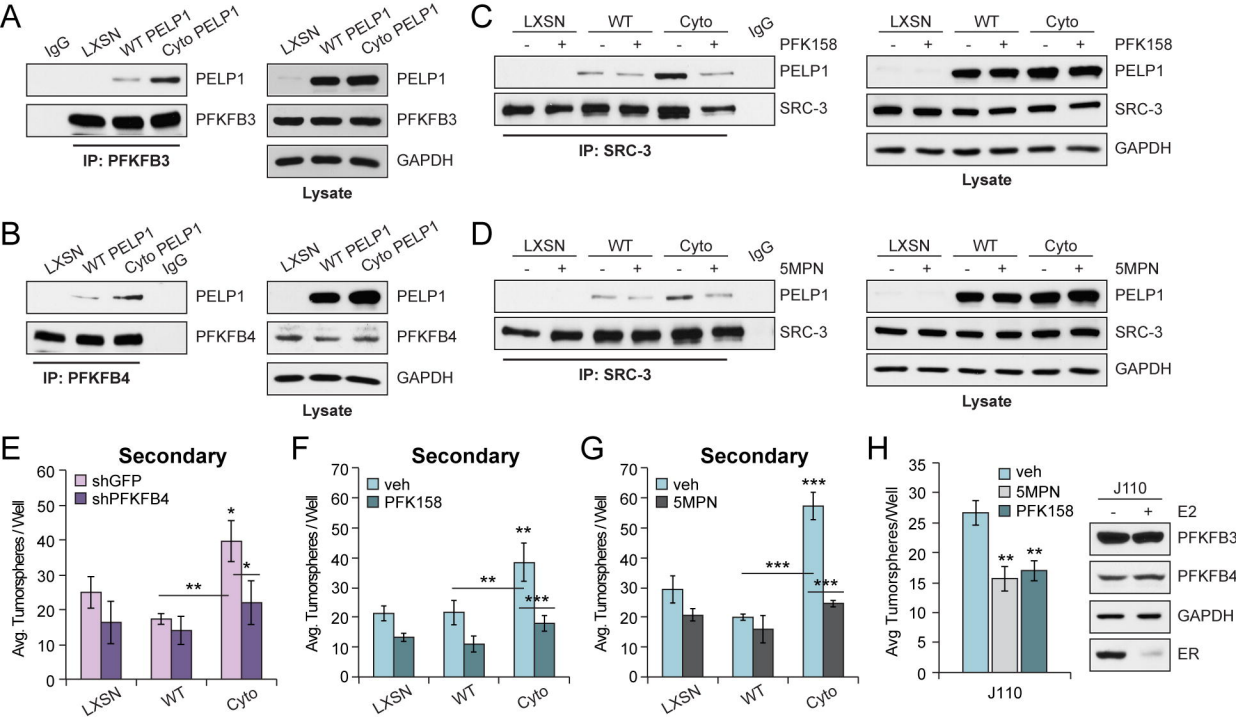

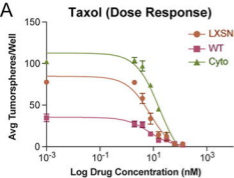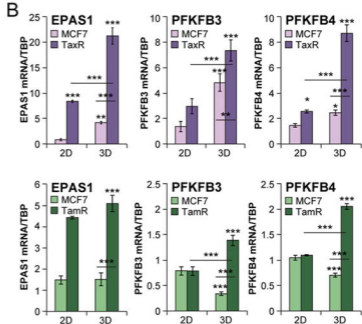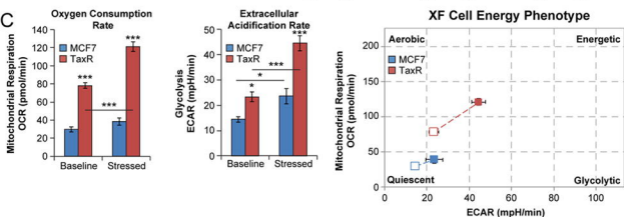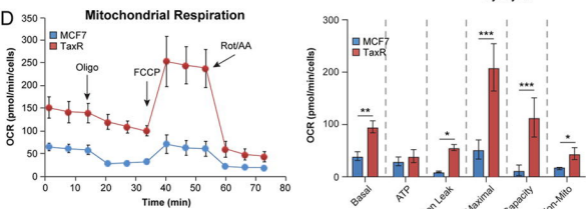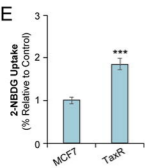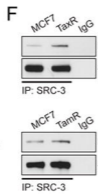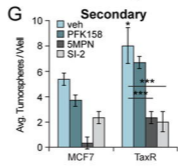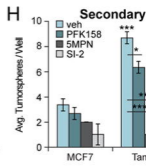

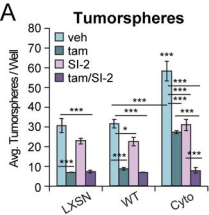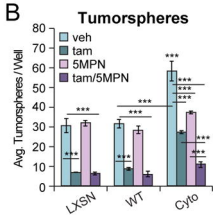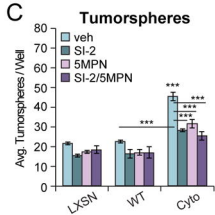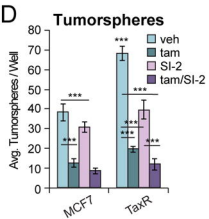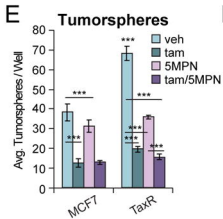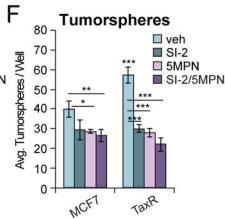



**A**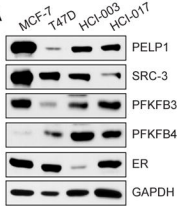**B**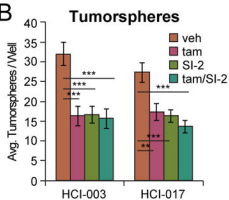**C**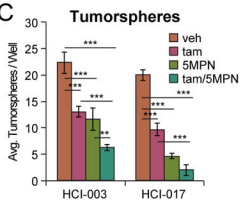**D**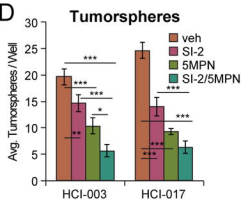

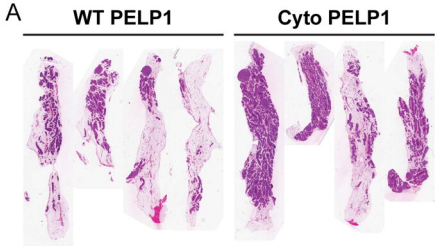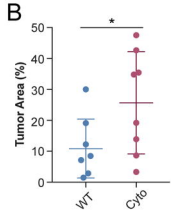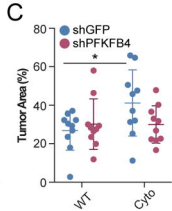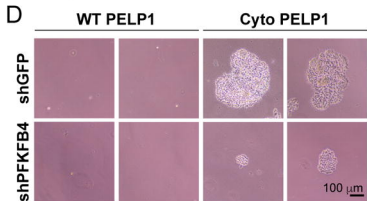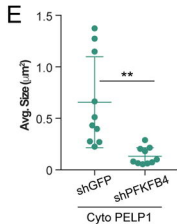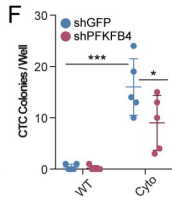

Source: https://biorxiv.org/content/10.1101/2020.08.07.238550v1.full.pdf
